# Supplementary material for: N-1,2,3-Triazole–isatin derivatives: anti-proliferation effects and target identification in solid tumour cell lines
Source: Royal Society of Chemistry journal article supplement (doi:10.1039/d2md00044j), 2022-01-01
Supplement: d2md00044j1.pdf [file d2md00044j1.pdf]

## Supporting Information

Natalia Busto<sup>a</sup>, Joana Leitão-Castro<sup>b</sup>, Alfonso T. García-Sosa<sup>c</sup>, Francisco Cadete<sup>b</sup>, Carolina S. Marques<sup>d</sup>, Renata Freitas<sup>b</sup>, Anthony J. Burke<sup>d,ef\*</sup>

<sup>a</sup> Departamento de Química, Universidad de Burgos, Plaza Misael Bañuelos s/n, 09001 Burgos, Spain.

<sup>b</sup> I3S-Instituto de Investigação e Inovação em Saúde, Universidade do Porto, Rua Alfredo Allen, 208 | 4200-135 Porto, Portugal

<sup>c</sup> Institute of Chemistry, University of Tartu, Ravila 14 A, Tartu 50411, Estonia.

<sup>d</sup> LAQV-REQUIMTE, University of Évora, Institute for Research and Advanced Studies, Rua Romão Ramalho, 59, 7000 Évora, Portugal.

<sup>e</sup>Chemistry Department, School of Science and Technology, University of Évora, Rua Romão Ramalho 59, 7000-671 Évora, Portugal.

\* Corresponding authors current address, Faculty of Pharmacy, University of Coimbra, Pólo das Ciências da Saúde, Azinhaga de Santa Comba, 3000-548 Coimbra, Portugal [ajburke@ff.uc.pt](mailto:ajburke@ff.uc.pt).

## Contents

|                                                              |     |
|--------------------------------------------------------------|-----|
| 1. MTT Antiproliferative Assays – lines 1                    | P-1 |
| 2. MTT Anti-proliferative Assay – lines 2                    | P-2 |
| 3. Gene expression analysis on Breast Cancer cell lines..... | P-3 |
| 4. <i>In Silico</i> Studies                                  | P-4 |
| 5. References                                                | P-5 |

### 1. MTT Antiproliferative Assay in SW480, A549 and Hek293 cell lines – lines 1

Approximately  $5 \times 10^3$  SW480 colon adenocarcinoma cells,  $3 \times 10^3$  A549 human lung adenocarcinoma cells and  $1 \times 10^4$  Hek293 human embryonic kidney cells were cultured in 200  $\mu$ l culture medium per well (Dulbecco's Modified Eagle's Medium (DMEM) for SW480 and A549 cells and Eagle's Minimum Essential Medium (EMEM) supplemented with 1% of non-essential aminoacids for Hek293 cells), both supplemented with 10% newborn calf serum and 1% amphotericin-penicillin-streptomycin solution in 96-well plates and incubated at 37 °C under a 5% CO<sub>2</sub> atmosphere. The cells were grown for 24h and then exposed to different concentrations of the tested drugs (dissolved in culture medium) for 72h. Then,

the treatment was removed and the cells were incubated with 100 µl of MTT (3-(4,5-dimethylthiazol-2-yl)-2,5-diphenyltetrazoliumbromide) (Sigma Aldrich) dissolved in culture medium (500 µg/ml). After 3h, 100 µl of solubilizing solution (10% (w/v) SDS, 0.01 M HCl) were added to each well and incubated for other 18 h. Absorbance was read at 590 nm in a microplate reader (Cytation 5 Cell Imaging Multi-Mode Reader - Biotek Instruments, USA). Four replicates per dose were included. The IC<sub>50</sub> values, that is, the concentrations which produced 50% inhibition of cell viability were calculated from MTT data using the GraphPadPrism Software Inc. (version 6.01) (USA).

## **2. MTT Anti-proliferative Assay in MCF7, MDA-MB-231 and MCF-10A cell lines: lines 2**

Around  $1 \times 10^4$  cells from each cell line were cultured on a 96-well plate, containing 200 µl per well of Dulbecco's Modified Eagle's Medium (DMEM, Gibco™) supplemented with 10% fetal bovine serum and 1% antibiotic solution penicillin-streptomycin (pen-strep, Gibco™) and incubated at 37 °C under a 5% CO<sub>2</sub> atmosphere. Afterwards, the cells were grown for 24h before being exposed to different concentrations of the tested drugs (ranging from 20 µM to 0 µM), dissolved in culture medium, for 72h. Thereupon, the drug treatments were removed and cells were incubated with 100 µl of 3-(4,5-dimethylthiazol-2-yl)-2,5-diphenyltetrazoliumbromide (MTT, Sigma Aldrich) dissolved in culture medium (500 µg/ml) for 3h. Upon incubation, 100 µl of solubilizing solution (10% (w/v) SDS, 0.01 M HCl) were added to each well and incubated for 18 h. Absorbance reading was performed at 590 nm using a microplate reader (Synergy™ Mx Monochromator-Based Multi-Mode Microplate Reader, BioTek Instruments, Inc.). All experiments were performed in triplicate. DMSO was used as vehicle control. The IC<sub>50</sub> values were calculated from MTT data using the GraphPadPrism Software Inc. (version 6.01) (USA).

### 3. *Gene expression analysis on Breast Cancer cell lines MCF7 and MDA-MB-231*

To assess whether gene expression of the target genes was altered, cell lines MCF7, MDA-MB-231<sup>1</sup> and MCF-10A were grown on a 12-well plate containing Dulbecco's Modified Eagle's Medium (DMEM, Gibco™). The medium for the breast cancer cell lines was supplemented with 10% fetal bovine serum and 1% antibiotic solution penicillin-streptomycin (pen-strep, Gibco™), while the medium for MCF-10A was supplemented with 5% of horse serum, human insulin (40µg/mL), human EGF (20ng/mL), cholera toxin (100ng/mL), hydrocortisone (500ng/mL), and 1% antibiotic solution penicillin-streptomycin (pen-strep, Gibco™). All the cells were incubated at 37 °C under a 5% CO<sub>2</sub> atmosphere. Upon 24h, each cell line was treated with each compound dissolved in medium, to the concentration of their respective IC<sub>50</sub> value. Hereupon, cells were incubated for 72h, before initiating the RNA extraction protocol. All experiments were performed in triplicate.

Total RNA extraction was performed using the NZY Total RNA Isolation kit (NZYtech™), followed by cDNA synthesis, using the High-Capacity cDNA Reverse Transcription Kit (Applied Biosystems), following the manufacturer's instructions. Afterwards, the synthesized cDNA was subject to qPCR amplification, using the iTaq™ Universal SYBR® Green Supermix (Bio-rad), performed on the real-time cycler CFX96™ (Bio-rad). Each reaction was carried out using 2µL of cDNA diluted 1:4, 0,5µL of the respective primer sequence (Forward and Reverse); 2µL of DNase/RNase free treated H<sub>2</sub>O and 5µL of 2x SYBR Green, comprising a total of 10µL per reaction, in each well of a 96-well PCR plate. All experiments were performed in triplicate, and glyceraldehyde-3-phosphate dehydrogenate (GAPDH) gene amplification was used as reference for normalization. The CFX Manager 3.1 software (Bio-Rad) was used to visualize amplification and melting curves, define the cycle amplification threshold (CT) and to assign each sample and negative control to its plate location. This data was exported as an excel file and analyzed using the formula "Ratio=  $E^{\text{target} - (\text{CT sample target gene})} / E^{\text{GAPDH} - (\text{CT sample GAPDH})}$ ", where E corresponds to primer efficiency. Statistical analysis was carried out through One-Way ANOVA, using Brown-Forsythe and Welch ANOVA test with Dunnett

T3 correction, using the GraphPadPrism Software Inc. (version 6.01). Primer sequences described on Table S1.

|        |    | Sequence (5'-3')        | Product bp |
|--------|----|-------------------------|------------|
| EP300  | FW | GACCCTCAGCTTTTAGGAATCC  | 353        |
|        | RV | TGCCGTAGCAACACAGTGT     |            |
| LYPLA2 | FW | GTAACACCATGTCTGTGCCC    | 222        |
|        | RV | GTCAAACCAGGAGGGCAT      |            |
| GAPDH  | FW | ACTGGCGTCTTCACCACCAT    | 142        |
|        | RV | TCTTGAGGCTGTTGTCATACTTC |            |

**Table S1:** EP300, LYPLA2 and GAPDH primer sequences and product length. Primer sequences for EP300 and GAPDH were obtained in accordance to the following methods (T. Li, H. Huang, B. Huang, B. Huang, J. Lu, *J. Genet. Genomics*, 36 (2009) 335-342 and S.A.d.B. Garcia, M. Araújo, R. Freitas, *Data in brief*, 30 (2020) 105572-105572). LYPLA2 primers were designed using primer3 online software. Bp, base pair; FW, forward primer; RV, reverse primer.

#### 4. In Silico Studies

SEA<sup>2</sup> provided suggestions for targets for the compounds by relating compounds to proteins using a similarity ensemble approach (SEA) based on the similarities of sets of ligands. Protein X-ray crystal structures were obtained from the Protein Data Bank. The crystal structures corresponded to the p300 acetyltransferase domain with allosteric inhibitor CPI-076 and CoA (6pgu, 1.72 Å<sup>3</sup>), as well as to human tryptophan 2,3-dioxygenase in complex with PF-06840003 in active site and exo site (5syn, 2.4 Å<sup>4</sup>). All protein structures were determined at high resolution. Hydrogen atoms were added with Maestro software.<sup>5</sup> Docking was then performed by extra precision Glide XP<sup>5</sup> with the default settings.

Molecular properties and PAINS filters were determined with SwissADME.<sup>6</sup>

#### 5. References

1. H. D. Soule, T M Maloney, S.R. Wolman, W.D. Peterson Jr, R. Brenz, C. M. McGrath, J. Russo, R.J. Pauley, R.F. Jones, S.C. Brooks, *Cancer Res.* 50 (1990) 6075-86.

2. M. J., Keiser, B.L. Roth, B. N. Armbruster, P. Ernsberger, J.J. Irwin, B.K. Shoichet, *Nat Biotech.* 25 (2007) 197–206.
3. A.S. Gardberg, A.J. Huhn, R. Cummings, A. Bommi-Reddy, F. Poy, J. Setser, V. Vivat, F. Brucelle, J. Wilson, *Struct Dyn.* 6 (2019) 054702 (1-6).
4. S. J. Won, D. Davda, K. J. Labby, S. Y. Hwang, R. Pricer, J. D. Majmudar, K. A. Armacost, L. A. Rodriguez, C. L. Rodriguez, F. S. Chong, K. A. Torossian, J. Palakurthi, E.S. Hur, J. L. Meagher, C. L. Brooks, J. A. Stuckey, B. R. Martin, *ACS Chem. Biol.* 11 (2016) 3374-3382.
5. Small Molecule Discovery package v. 2019, Schrödinger, NY, 2019.
6. A. Daina, O. Michielin, V. Zoete, *Sci. Rep.* 7 (2017) 42717 (1-13).
